# Supplementary material
Source: Research Square preprint supplement (doi:10.21203/rs.3.rs-10368493/v1)

**Annex i**: Ethical clearance _ERES Converge IRB


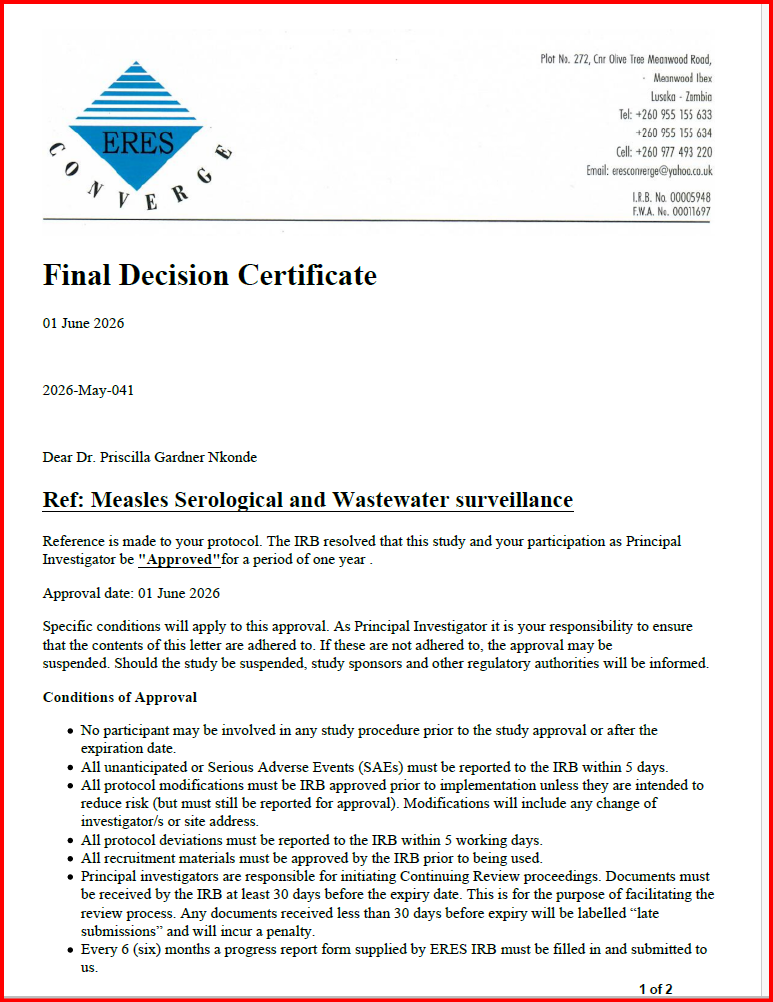


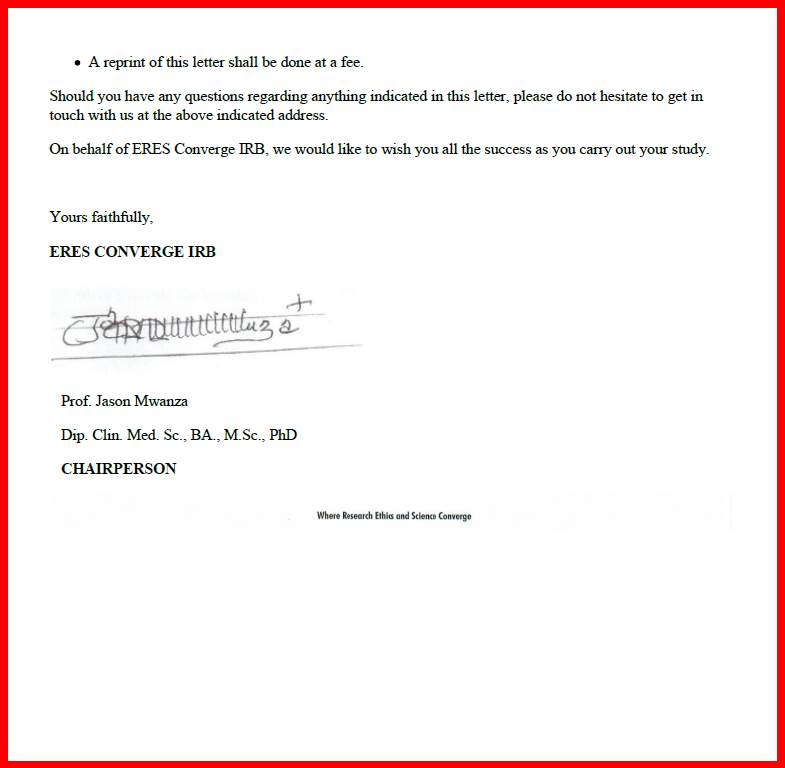


**Annex ii**: National Health Research Authority Clearance (NHRA)


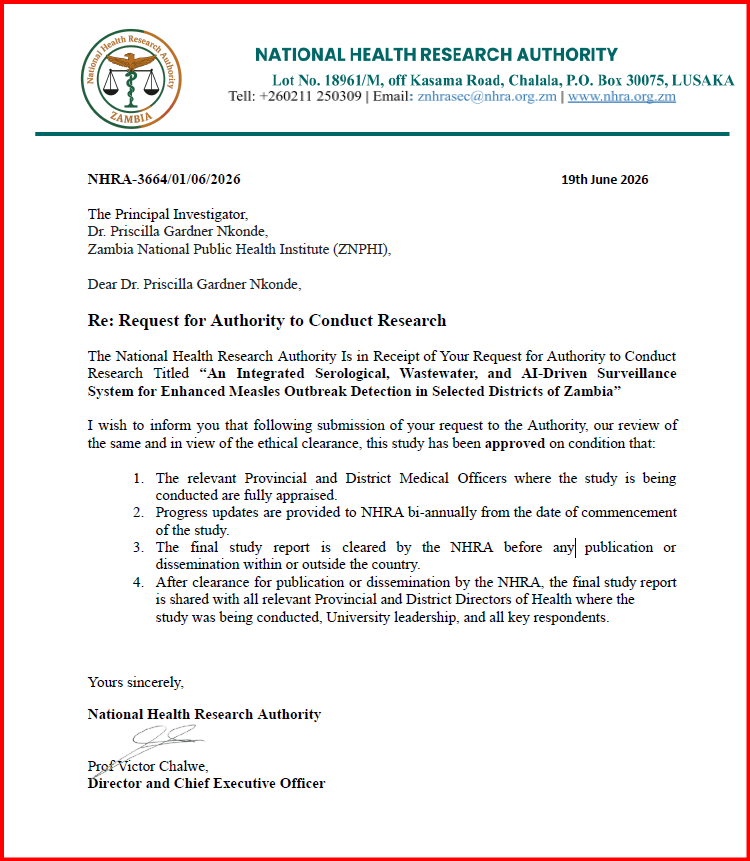

Supplement: Supplementary file 1 [file 1e02c527f98d33a11b26bddd.docx]
